# Supplementary material for: Population-Based Screening or Targeted Screening Based on Initial Clinical Risk Assessment for Atrial Fibrillation: A Report from the Huawei Heart Study
Source: MDPI journal article supplement (doi:10.3390/jcm9051493), 2020-05-15
Supplement: s1 [file s1]

## Supplementary

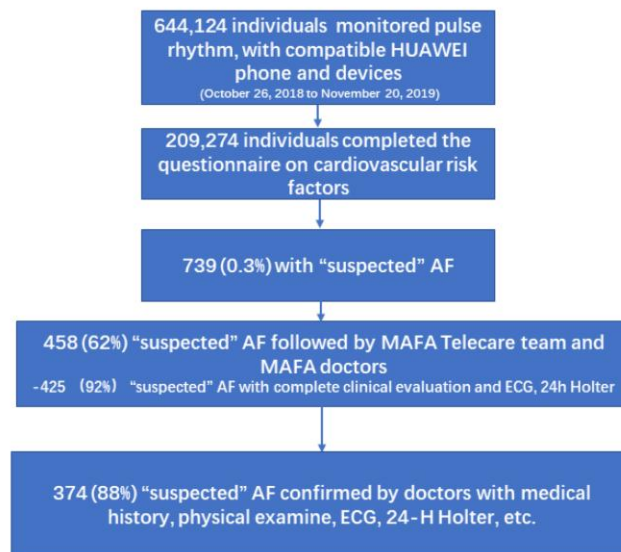

**Figure S1.** Screening and confirmation of AF.
